# Supplementary material for: Highly Proton-Conducting Membranes Based on Poly(arylene ether)s with Densely Sulfonated and Partially Fluorinated Multiphenyl for Fuel Cell Applications
Source: MDPI journal article supplement (doi:10.3390/membranes11080626), 2021-08-15
Supplement: s1 [file s1]

## Supporting Materials

# Highly Proton-Conducting Membranes Based on Poly(Arylene Ether)s with Densely Sulfonated and Partially Fluorinated Multiphenyl for Fuel Cell Applications

Tzu-Sheng Huang<sup>1</sup>, Tung-Li Hsieh<sup>2</sup>, Chih-Ching Lai<sup>1</sup>, Hsin-Yi Wen<sup>3</sup>, Wen-Yao Huang<sup>1,\*</sup> and Mei-Ying Chang<sup>1,\*</sup>

<sup>1</sup> Department of Photonics, National Sun Yat-Sen University, Kaohsiung 804, Taiwan; zxp86133@gmail.com (T.S.H.); jackko61010@gmail.com (C.C.L.)

<sup>2</sup> General Education Center, Wenzao Ursuline University of Languages, Kaohsiung 807, Taiwan; tunglihsieh@gmail.com (T.L.H.)

<sup>3</sup> Department of Green Energy and Environmental Resources, Chang Jung Christian University, Tainan City 71101, Taiwan.; hywen@mail.cjcu.edu.tw (H.Y.W.)

\* Correspondence: wyhuang@mail.nsysu.edu.tw (W.Y.H.); mychang01@mail.nsysu.edu.tw (M.Y.C.)

We also measured the FTIR, <sup>1</sup>H NMR and MALDI-TOF of this series compounds, shown in Figure S1 to Figure S16.

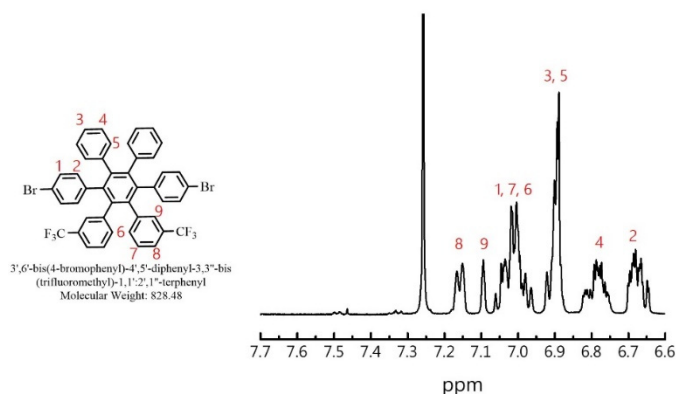

**Figure S1.** <sup>1</sup>H NMR spectrum of 3',6'-bis(4-bromophenyl)-4',5'-diphenyl-3,3''-bis(trifluoromethyl)-1,1':2',1''-terphenyl (1) (6F7B-DB).

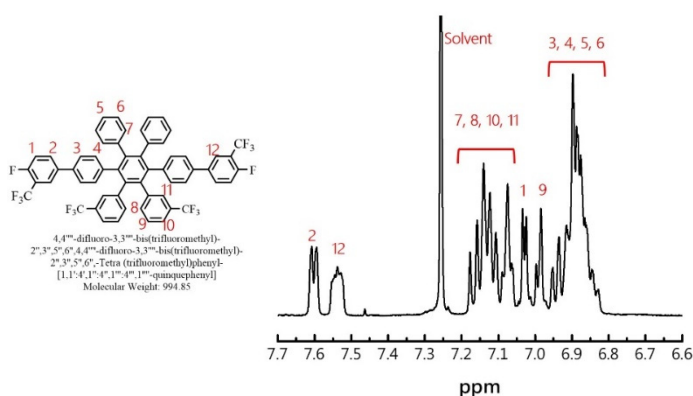

**Figure S2.** <sup>1</sup>H NMR spectrum of 4,4''-difluoro-3,3''-bis(trifluoromethyl)-2',3',5'',6''-4,4''-difluoro-3,3''-bis(trifluoromethyl)-2'',3'',5',6',-Tetra(trifluoromethyl)phenyl-[1,1':4'',1''':4''',1''':4''',1''':4'''-quinquephenyl] (2) (12F9B-DF).

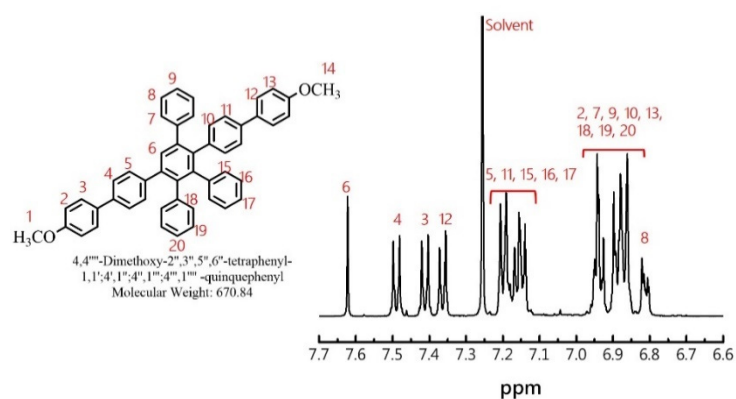

**Figure S3.**  $^1\text{H}$  NMR spectrum of 4,4''-Dimethoxy-2'',3'',5''-triphenyl-1,1':4',1'':4'',1'''-quinquephenyl (3) (8B-DMO).

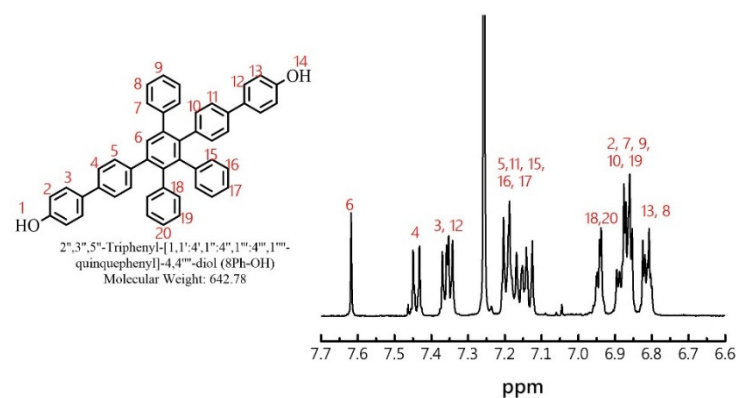

**Figure S4.**  $^1\text{H}$  NMR spectrum of 2'',3'',5''-Triphenyl-[1,1':4',1'':4'',1'''-quinquephenyl]-4,4''-diol (4) (8B-DO).

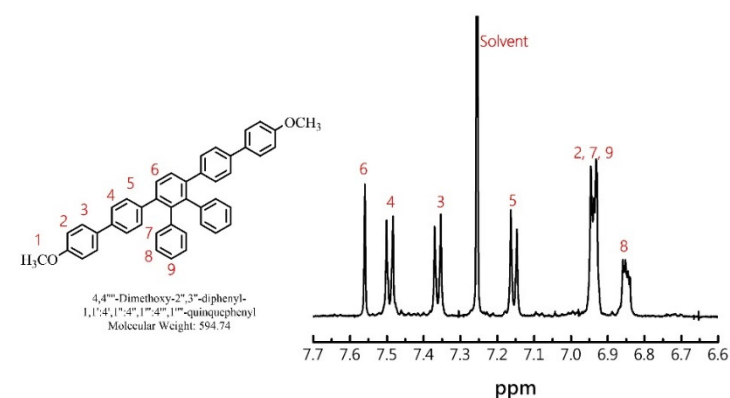

**Figure S5.**  $^1\text{H}$  NMR spectrum of 4,4''-Dimethoxy-2'',3''-diphenyl-1,1':4',1'':4'',1'''-quinquephenyl (5)(7B-DMO).

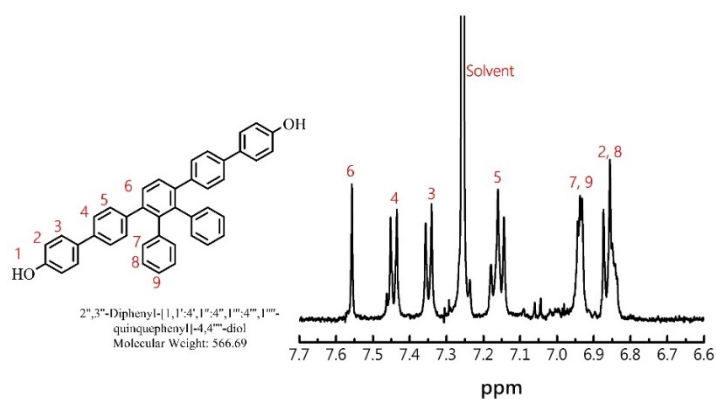

**Figure S6.**  $^1\text{H}$  NMR spectrum of 2'',3''-Diphenyl-[1,1':4',1'':4'',1''':4''',1''''-quinquephenyl]-4,4''''-diol (6) (7B-DO).

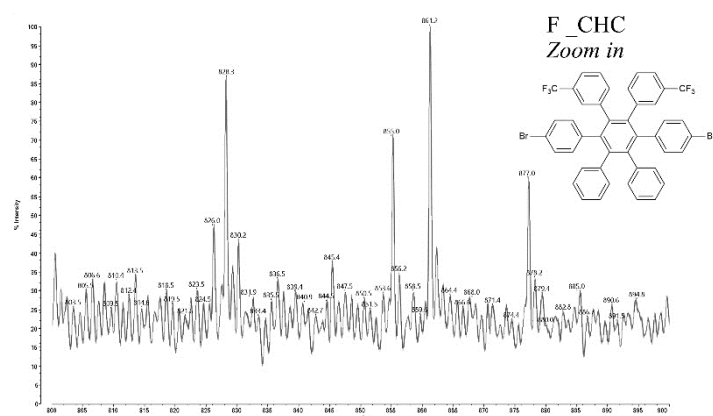

**Figure S7.** MALDI-TOF spectrum of 6F7B-DB.

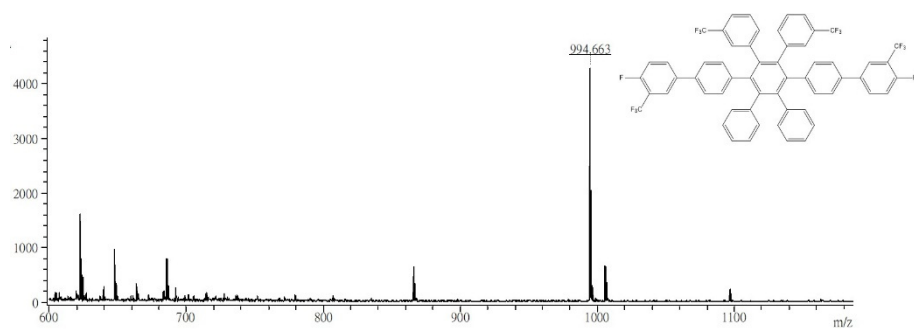

**Figure S8.** MALDI-TOF spectrum of 12F9B-DF.

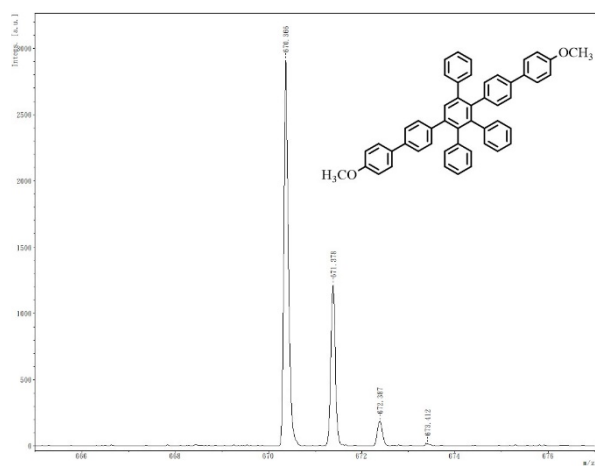

**Figure S9.** MALDI-TOF spectrum of 8B-DMO.

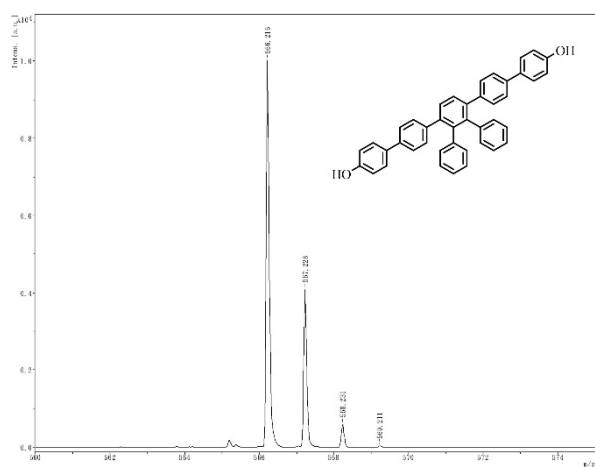

**Figure S10.** MALDI-TOF spectrum of 8B-DO.

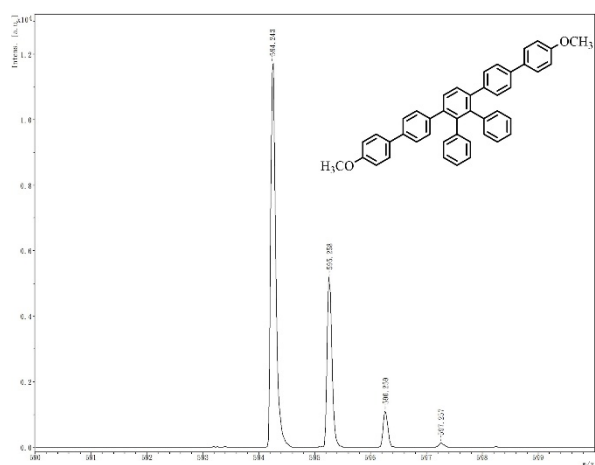

**Figure S11.** MALDI-TOF spectrum of 7B-DMO.

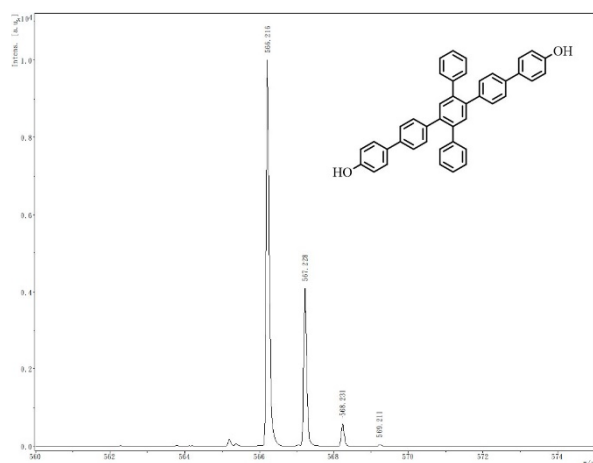

**Figure S12.** MALDI-TOF spectrum of 7B-DO.

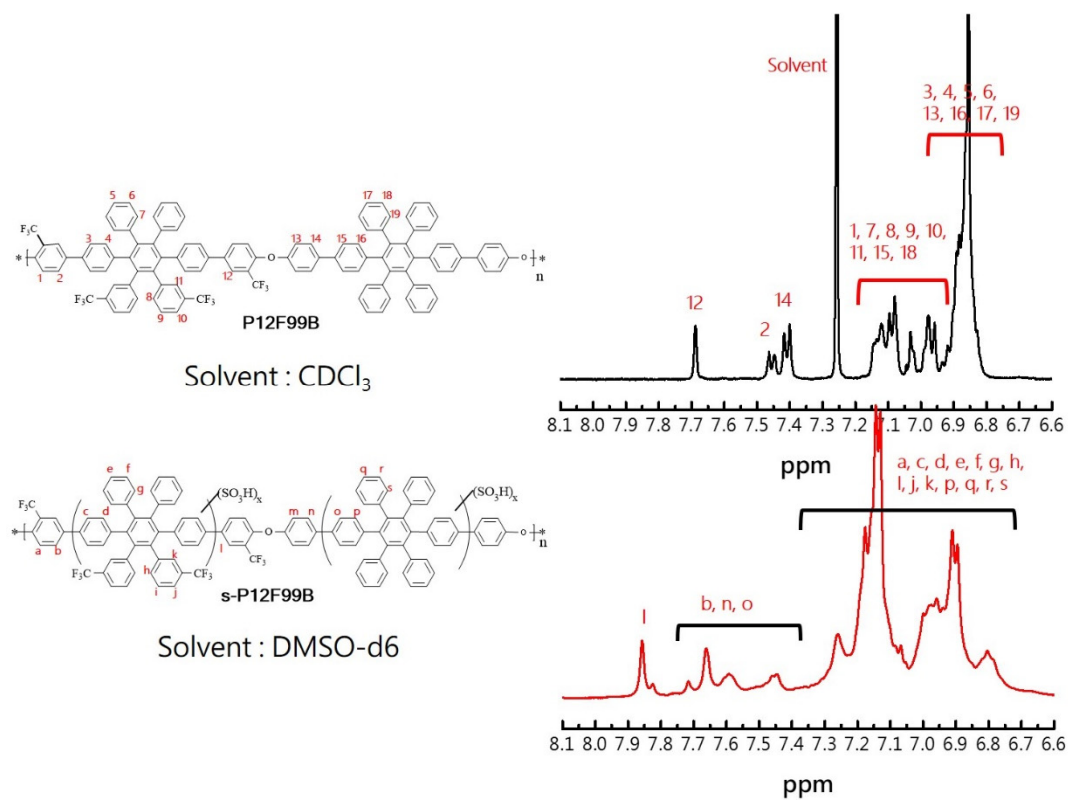

**Figure S13.**  $^1\text{H}$  NMR spectrum of P12F99B (top) and s-P12F99B (bottom).

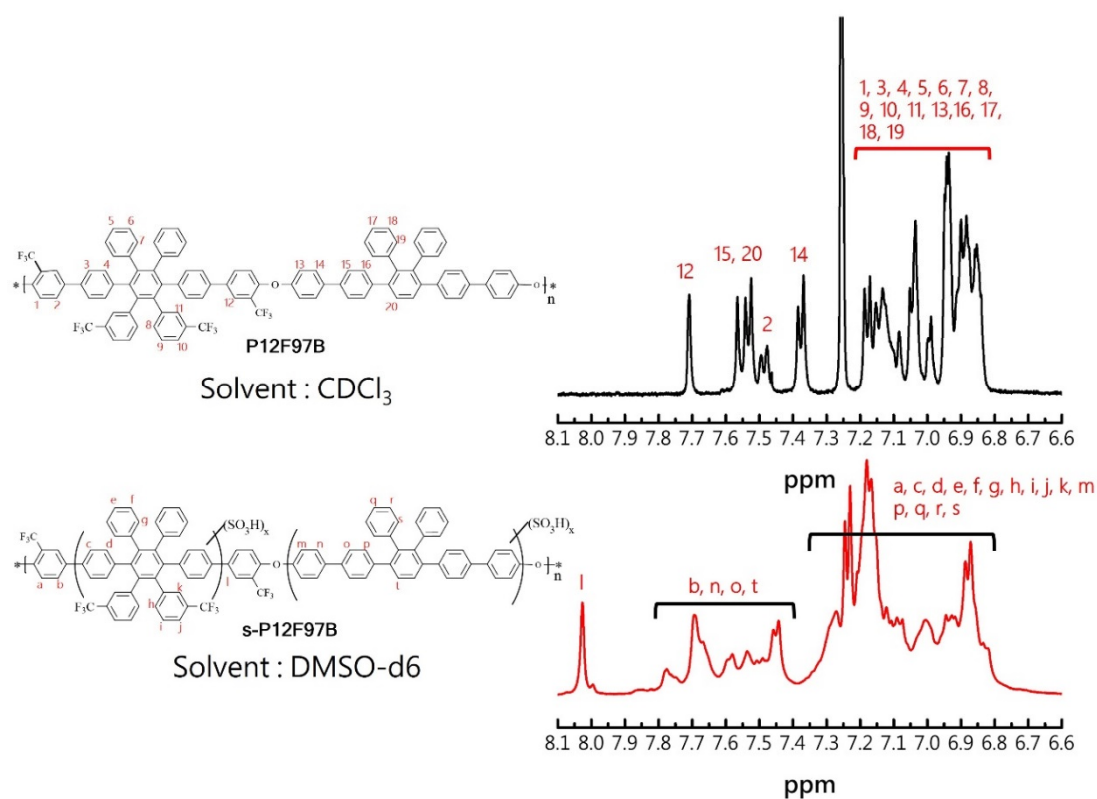

**Figure S14.**  $^1\text{H}$  NMR spectrum of P12F97B (top) and s-P12F97B (bottom).

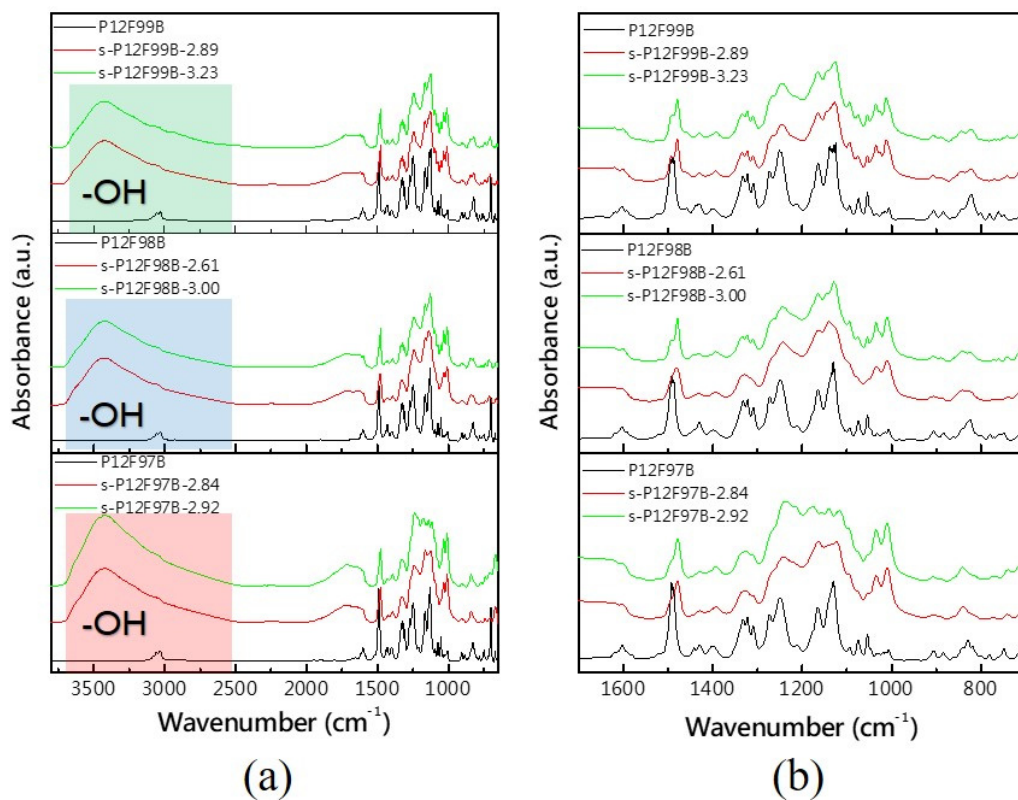

**Figure S15.** FTIR spectra of the P12FmB polymers and after sulfonation from (a) 650 to 3800  $\text{cm}^{-1}$  and (b) 700 to 1700  $\text{cm}^{-1}$ .
